# Supplementary figures and images for: Gastrointestinal transit measurements in mice with 99mTc-DTPA-labeled activated charcoal using NanoSPECT-CT
Source: Springer Nature journal article supplement (doi:10.1186/2191-219x-3-60), 2013-01-01

M

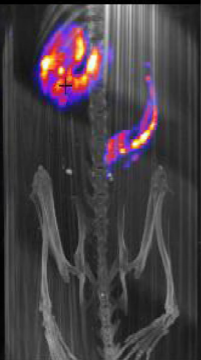

$^{99m}\text{Tc}$ -Ch-DTPA 1 hour

M

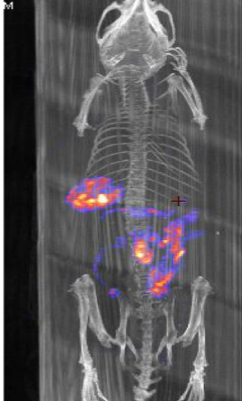

$^{99m}\text{Tc}$ -Ch-DTPA 3 hours

Supplement: 13550_2013_158_MOESM3_ESM.pdf [file 13550_2013_158_MOESM3_ESM.pdf]
